# Supplementary material
Source: PubMed Central journal article supplement (PMC8968687)

## Supplementary Figure 2

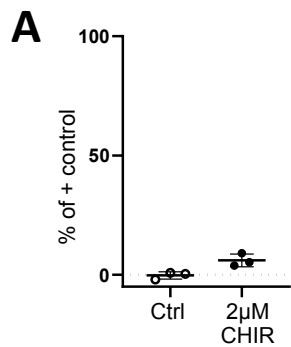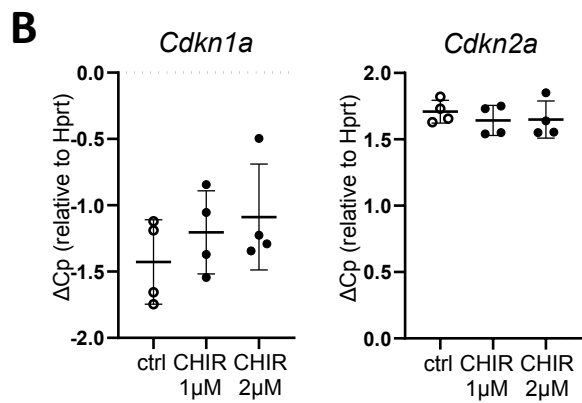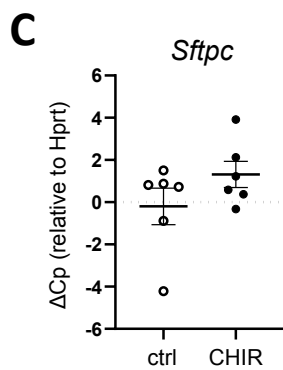

Supplement: NIHMS1789093-supplement-Supplementary_Figure_2.pdf [file NIHMS1789093-supplement-Supplementary_Figure_2.pdf]

# Supplementary Figure 3

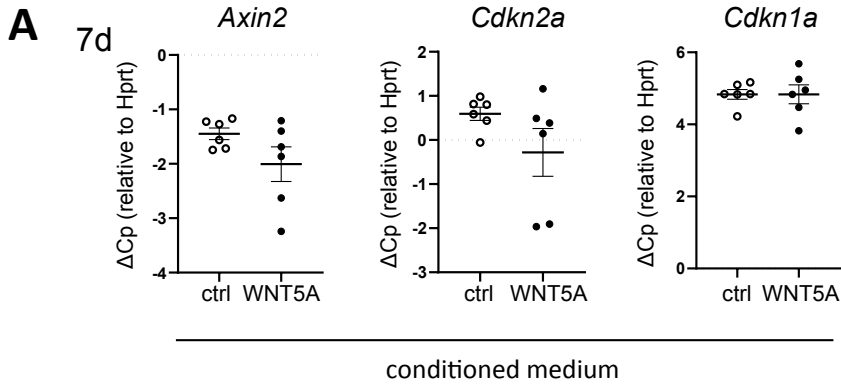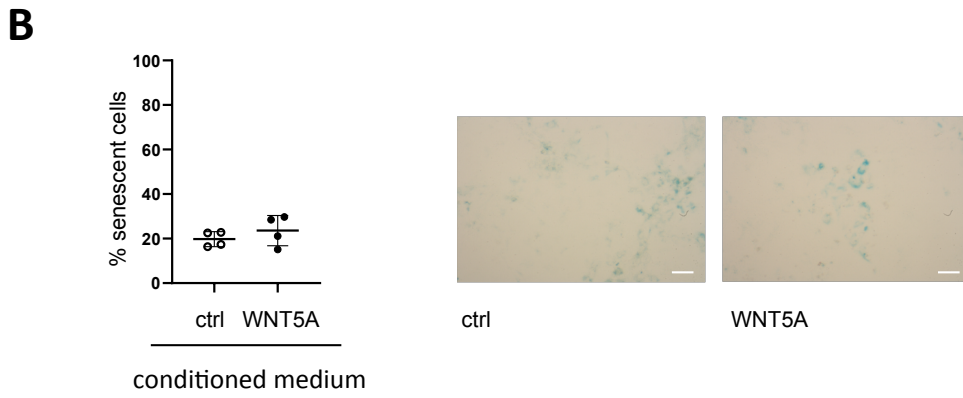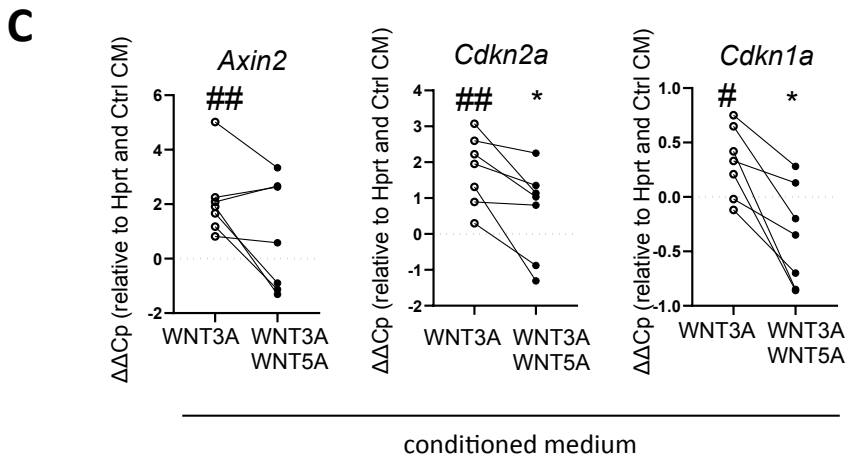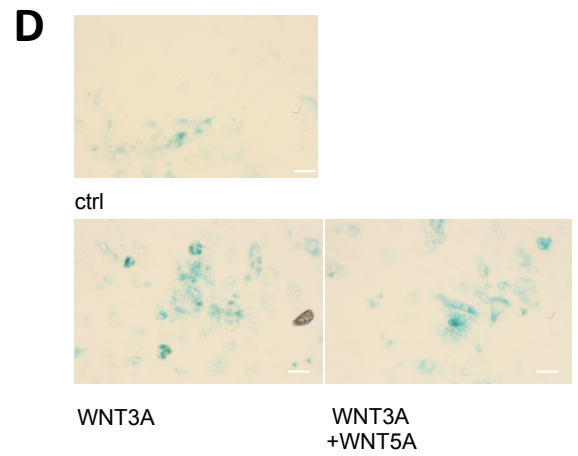

Supplement: NIHMS1789093-supplement-Supplementary_Figure_3.pdf [file NIHMS1789093-supplement-Supplementary_Figure_3.pdf]
